# Supplementary material
Source: ML conference proceedings conference paper supplement (https://proceedings.neurips.cc/paper_files/paper/2022/hash/e0fbc0f2e35e58aeffe5524a69ba90e5-Abstract.html)
Supplement: Supplementary file 1 [file e0fbc0f2e35e58aeffe5524a69ba90e5-Supplemental-Conference.pdf]

---

# APPENDIX OF MARKOV CHAIN SCORE ASCENT: A Unifying Framework of Variational Inference *with* Markovian Gradients

---

## A Computational Resources

Table 5: Computational Resources for Bayesian Neural Network Regression

| Type            | Model and Specifications                              |
|-----------------|-------------------------------------------------------|
| System Topology | 4 nodes with 20 logical threads each                  |
| Processor       | Intel Xeon Xeon E5-2640 v4, 2.2 GHz (maximum 3.1 GHz) |
| Cache           | 32 kB L1, 256 kB L2, and 25 MB L3                     |
| Memory          | 64GB RAM                                              |

Table 6: Computational Resources for Robust Gaussian Process Regression

| Type            | Model and Specifications                 |
|-----------------|------------------------------------------|
| System Topology | 1 node with 16 logical threads           |
| Processor       | AMD EPYC 7262, 3.2 GHz (maximum 3.4 GHz) |
| Accelerator     | NVIDIA Titan RTX, 1.3 GHz, 24GB RAM      |
| Cache           | 256 kB L1, 4MiB L2, and 128MiB L3        |
| Memory          | 126GB RAM                                |

## B Pseudocodes

### B.1 Markov Chain Monte Carlo Kernels

---

**Algorithm 2:** Conditional Importance Sampling Kernel

---

**Input:** previous sample  $\mathbf{z}_{t-1}$ ,  
previous parameter  $\lambda_{t-1}$ ,  
number of proposals  $N$

$$\mathbf{z}^{(0)} = \mathbf{z}_{t-1}$$

$$\mathbf{z}^{(i)} \sim q_{\text{def.}}(\mathbf{z}; \lambda_{t-1}) \quad \text{for } i = 1, 2, \dots, N$$

$$\tilde{w}(\mathbf{z}^{(i)}) = p(\mathbf{z}^{(i)}, \mathbf{x}) / q_{\text{def.}}(\mathbf{z}^{(i)}; \lambda_{t-1}) \quad \text{for } i = 0, 1, \dots, N$$

$$\bar{w}^{(i)} = \frac{\tilde{w}(\mathbf{z}^{(i)})}{\sum_{i=0}^N \tilde{w}(\mathbf{z}^{(i)})} \quad \text{for } i = 0, 1, \dots, N$$

$$\mathbf{z}_t \sim \text{Multinomial}(\bar{w}^{(0)}, \bar{w}^{(1)}, \dots, \bar{w}^{(N)})$$


---

---

**Algorithm 3:** Independent Metropolis-Hastings Kernel

---

**Input:** previous sample  $\mathbf{z}_{t-1}$ ,  
previous parameter  $\lambda_{t-1}$ ,

$\mathbf{z}^* \sim q_{\text{def.}}(\mathbf{z}; \lambda_{t-1})$   
 $\tilde{w}(\mathbf{z}) = p(\mathbf{z}, \mathbf{x})/q_{\text{def.}}(\mathbf{z}; \lambda_{t-1})$   
 $\alpha = \min(\tilde{w}(\mathbf{z}^*)/\tilde{w}(\mathbf{z}_{t-1}), 1)$   
 $u \sim \text{Uniform}(0, 1)$   
**if**  $u < \alpha$  **then**  
|  $\mathbf{z}_t = \mathbf{z}^*$   
**else**  
|  $\mathbf{z}_t = \mathbf{z}_{t-1}$   
**end**

---

## B.2 Markov Chain Score Ascent Algorithms

---

**Algorithm 4:** Markovian Score Climbing

---

**Input:** Initial sample  $\mathbf{z}_0$ ,  
initial parameter  $\lambda_0$ ,  
number of iterations  $T$ ,  
stepsize schedule  $\gamma_t$

**for**  $t = 1, 2, \dots, T$  **do**  
|  $\mathbf{z}_t \sim K_{\lambda_{t-1}}(\mathbf{z}_{t-1}, \cdot)$   
|  $\mathbf{g}(\lambda) = -\mathbf{s}(\lambda; \mathbf{z}_t)$   
|  $\lambda_t = \lambda_{t-1} - \gamma_t \mathbf{g}(\lambda_{t-1})$   
**end**

---

---

**Algorithm 5:** Joint Stochastic Approximation

---

**Input:** Initial sample  $\mathbf{z}_0^{(N)}$ ,  
initial parameter  $\lambda_0$ ,  
number of iterations  $T$ ,  
stepsize schedule  $\gamma_t$

**for**  $t = 1, 2, \dots, T$  **do**  
|  $\mathbf{z}_t^{(0)} = \mathbf{z}_{t-1}^{(N)}$   
| **for**  $n = 1, 2, \dots, N$  **do**  
| |  $\mathbf{z}_t^{(n)} \sim K_{\lambda_{t-1}}(\mathbf{z}_t^{(n-1)}, \cdot)$   
| **end**  
|  $\mathbf{g}(\lambda) = -\frac{1}{N} \sum_{n=1}^N \mathbf{s}(\lambda; \mathbf{z}_t^{(n)})$   
|  $\lambda_t = \lambda_{t-1} - \gamma_t \mathbf{g}(\lambda_{t-1})$   
**end**

---

## C Probabilistic Models Used in the Experiments

### C.1 Bayesian Neural Network Regression

We use the BNN model of [Hernandez-Lobato & Adams \(2015\)](#) defined as

$$\begin{aligned}
 \lambda^{-1} &\sim \text{inverse-gamma}(\alpha = 6, \beta = 6) \\
 \gamma^{-1} &\sim \text{inverse-gamma}(\alpha = 6, \beta = 6) \\
 \mathbf{W}_1 &\sim \mathcal{N}(\mathbf{0}, \lambda^{-1} \mathbf{I}) \\
 \mathbf{z} &= \text{ReLU}(\mathbf{W}_1 \mathbf{x}_i) \\
 \mathbf{W}_2 &\sim \mathcal{N}(\mathbf{0}, \lambda^{-1} \mathbf{I}) \\
 \hat{y} &= \text{ReLU}(\mathbf{W}_2 \mathbf{z}) \\
 y_i &\sim \mathcal{N}(\hat{y}, \gamma^{-1}),
 \end{aligned}$$

where  $\mathbf{x}_i$  and  $y_i$  are the feature vector and target value of the  $i$ th datapoint. Given the variational distribution of  $\lambda^{-1}, \gamma^{-1}, \mathbf{W}_1, \mathbf{W}_2$ , we use the same posterior predictive approximation of [Hernandez-Lobato & Adams \(2015\)](#). We apply z-standardization (whitening) to the features  $\mathbf{x}_i$  and the target values  $y_i$ , and unwhiten the predictive distribution.

### C.2 Robust Gaussian Process Logistic Regression

We perform robust Gaussian process regression by using a student-t prior with a latent Gaussian process prior. The model is defined as

$$\begin{aligned}
 \log \sigma_f &\sim \mathcal{N}(0, 4) \\
 \log \epsilon &\sim \mathcal{N}(0, 4) \\
 \log \ell_i &\sim \mathcal{N}(0, 0.2) \\
 f &\sim \mathcal{GP}(\mathbf{0}, \Sigma_{\sigma_f, \ell} + (\delta + \epsilon^2) \mathbf{I}) \\
 \nu &\sim \text{gamma}(\alpha = 4, \beta = 1/10) \\
 \log \sigma_y &\sim \mathcal{N}(0, 4) \\
 y_i &\sim \text{student-t}(f(\mathbf{x}_i), \sigma_y, \nu).
 \end{aligned}$$

The covariance  $\Sigma$  is computed using a kernel  $k(\cdot, \cdot)$  such that  $[\Sigma]_{i,j} = k(\mathbf{x}_i, \mathbf{x}_j)$  where  $\mathbf{x}_i$  and  $\mathbf{x}_j$  are data points in the dataset. For the kernel, we use the Matern 5/2 kernel with automatic relevance determination ([Neal, 1996](#)) defined as

$$k(\mathbf{x}, \mathbf{x}'; \sigma^2, \ell_1^2, \dots, \ell_D^2) = \sigma_f \left( 1 + \sqrt{5}r + \frac{5}{3}r^2 \right) \exp(-\sqrt{5}r), \quad \text{where } r = \sum_{i=1}^D \frac{(\mathbf{x}_i - \mathbf{x}'_i)^2}{\ell_i^2}$$

and  $D$  is the number of dimensions. The jitter term  $\delta$  is used for numerical stability. We set a small value of  $\delta = 1 \times 10^{-6}$ .

## D Proofs

**Proposition 1.** Let  $\boldsymbol{\eta} = (\mathbf{z}^{(1)}, \mathbf{z}^{(2)}, \dots, \mathbf{z}^{(N)})$  and a Markov chain kernel  $P_\lambda(\boldsymbol{\eta}, \cdot)$  be  $\Pi$ -invariant where  $\Pi$  is defined as

$$\Pi(\boldsymbol{\eta}) = \pi(\mathbf{z}^{(1)}) \pi(\mathbf{z}^{(2)}) \times \dots \times \pi(\mathbf{z}^{(N)}).$$

Then, by defining the objective function  $f$  and the gradient estimator  $\mathbf{g}$  to be

$$f(\boldsymbol{\lambda}, \boldsymbol{\eta}) = -\frac{1}{N} \sum_{n=1}^N \log q(\mathbf{z}^{(n)}; \boldsymbol{\lambda}) - \mathbb{H}[\pi] \quad \text{and} \quad \mathbf{g}(\boldsymbol{\lambda}, \boldsymbol{\eta}) = -\frac{1}{N} \sum_{n=1}^N \mathbf{s}(\mathbf{z}^{(n)}; \boldsymbol{\lambda}),$$

where  $\mathbb{H}[\pi]$  is the entropy of  $\pi$ , MCGD results in inclusive KL minimization as

$$\mathbb{E}_\Pi[f(\boldsymbol{\lambda}, \boldsymbol{\eta})] = d_{\text{KL}}(\pi \parallel q(\cdot; \boldsymbol{\lambda})) \quad \text{and} \quad \mathbb{E}_\Pi[\mathbf{g}(\boldsymbol{\lambda}, \boldsymbol{\eta})] = \nabla_\lambda d_{\text{KL}}(\pi \parallel q(\cdot; \boldsymbol{\lambda})).$$

*Proof.* For notational convenience, we define the shorthand

$$\pi(\mathbf{z}^{(1:N)}) = \pi(\mathbf{z}^{(1)}) \pi(\mathbf{z}^{(2)}) \times \dots \times \pi(\mathbf{z}^{(N)}).$$

Then,

$$\begin{aligned} \mathbb{E}_\Pi[f(\boldsymbol{\lambda}, \boldsymbol{\eta})] &= \int \left( -\frac{1}{N} \sum_{n=1}^N \log q(\mathbf{z}^{(n)}; \boldsymbol{\lambda}) - \mathbb{H}[\pi] \right) \pi(\mathbf{z}^{(1:N)}) d\mathbf{z}^{(1:N)} \\ &= \int \left( -\frac{1}{N} \sum_{n=1}^N \log q(\mathbf{z}^{(n)}; \boldsymbol{\lambda}) \right) \pi(\mathbf{z}^{(1:N)}) d\mathbf{z}^{(1:N)} - \mathbb{H}[\pi] \\ &= \frac{1}{N} \sum_{n=1}^N \left\{ \int (-\log q(\mathbf{z}^{(n)}; \boldsymbol{\lambda})) \pi(\mathbf{z}^{(1:N)}) d\mathbf{z}^{(1:N)} \right\} - \mathbb{H}[\pi] \\ &= \frac{1}{N} \sum_{n=1}^N \int (-\log q(\mathbf{z}^{(n)}; \boldsymbol{\lambda})) \pi(\mathbf{z}^{(n)}) d\mathbf{z}^{(n)} - \mathbb{H}[\pi] \quad \text{Marginalized } \mathbf{z}^{(m)} \text{ for all } m \neq n \\ &= \frac{1}{N} \sum_{n=1}^N \int (-\log q(\mathbf{z}^{(n)}; \boldsymbol{\lambda}) + \log \pi(\mathbf{z}^{(n)})) \pi(\mathbf{z}^{(n)}) d\mathbf{z}^{(n)} \quad \text{Definition of } \mathbb{H}[\pi] \\ &= \frac{1}{N} \sum_{n=1}^N \int \pi(\mathbf{z}^{(n)}) \log \frac{\pi(\mathbf{z}^{(n)})}{q(\mathbf{z}^{(n)}; \boldsymbol{\lambda})} d\mathbf{z}^{(n)} \\ &= \frac{1}{N} \sum_{n=1}^N d_{\text{KL}}(\pi \parallel q(\cdot; \boldsymbol{\lambda})) \quad \text{Definition of } d_{\text{KL}} \\ &= d_{\text{KL}}(\pi \parallel q(\cdot; \boldsymbol{\lambda})). \end{aligned} \tag{4}$$

For  $\mathbb{E}_\Pi[\mathbf{g}(\boldsymbol{\lambda}, \boldsymbol{\eta})]$ , note that

$$\nabla_\lambda f(\boldsymbol{\lambda}, \boldsymbol{\eta}) = -\frac{1}{N} \sum_{n=1}^N \nabla_\lambda \log q(\mathbf{z}^{(n)}; \boldsymbol{\lambda}) = -\frac{1}{N} \sum_{n=1}^N \mathbf{s}(\mathbf{z}^{(n)}; \boldsymbol{\lambda}) = \mathbf{g}(\boldsymbol{\lambda}, \boldsymbol{\eta}). \tag{5}$$

Therefore, it suffices to show that

$$\begin{aligned} \nabla_\lambda d_{\text{KL}}(\pi \parallel q(\cdot; \boldsymbol{\lambda})) &= \nabla_\lambda \mathbb{E}_\Pi[f(\boldsymbol{\lambda}, \boldsymbol{\eta})] && \text{Equation (4)} \\ &= \mathbb{E}_\Pi[\nabla_\lambda f(\boldsymbol{\lambda}, \boldsymbol{\eta})] && \text{Leibniz derivative rule} \\ &= \mathbb{E}_\Pi[\mathbf{g}(\boldsymbol{\lambda}, \boldsymbol{\eta})]. && \text{Equation (5)} \end{aligned}$$

□

**Proposition 2.** The maximum importance weight  $w^* = \sup_{\mathbf{z}} w(\mathbf{z}) = \sup_{\mathbf{z}} \pi(\mathbf{z})/q(\mathbf{z}; \boldsymbol{\lambda})$  is bounded below exponentially by the KL divergence as

$$\exp(d_{\text{KL}}(\pi \parallel q(\cdot; \boldsymbol{\lambda}))) < w^*.$$

Proof.

$$\begin{aligned}
d_{\text{KL}}(\pi \parallel q(\cdot; \lambda)) &= \mathbb{E}_{\mathbf{z} \sim \pi(\cdot)} \left[ \log \frac{\pi(\mathbf{z})}{q(\mathbf{z}; \lambda)} \right] && \text{Definition of } d_{\text{KL}} \\
&\leq \log \mathbb{E}_{\mathbf{z} \sim \pi(\cdot)} \left[ \frac{\pi(\mathbf{z})}{q(\mathbf{z}; \lambda)} \right] && \text{Jensen's inequality} \\
&\leq \log \mathbb{E}_{\mathbf{z} \sim \pi(\cdot)} [w^*] \\
&= \log w^*.
\end{aligned}$$

□

**Lemma 1.** For the probability measures  $p_1, \dots, p_N$  and  $q_1, \dots, q_N$  defined on a measurable space  $(X, \mathcal{A})$  and an arbitrary set  $A \in \mathcal{A}$ ,

$$\begin{aligned}
&\left| \int_{A^N} p_1(dx_1) p_2(dx_2) \times \dots \times p_N(dx_N) - q_1(dx_1) q_2(dx_2) \times \dots \times q_N(dx_N) \right| \\
&\leq \sum_{n=1}^N \left| \int_A p_n(dx_n) - q_n(dx_n) \right|
\end{aligned}$$

Proof. By using the following shorthand notations

$$\begin{aligned}
p_{(1:N)}(dx_{(1:N)}) &= p_1(dx_1) p_2(dx_2) \times \dots \times p_N(dx_N) \\
q_{(1:N)}(dx_{(1:N)}) &= q_1(dx_1) q_2(dx_2) \times \dots \times q_N(dx_N),
\end{aligned}$$

the result follows from induction as

$$\begin{aligned}
&\left| \int_{A^N} p_{(1:N)}(dx_{(1:N)}) - q_{(1:N)}(dx_{(1:N)}) \right| \\
&= \left| \left( \int_A p_1(dx_1) - q_1(dx_1) \right) \int_{A^{N-1}} p_{(2:N)}(dx_{(2:N)}) \right. \\
&\quad \left. + \int_A q_1(dx_1) \left( \int_{A^{N-1}} p_{(2:N)}(dx_{(2:N)}) - q_{(2:N)}(dx_{(2:N)}) \right) \right| \\
&\leq \left| \int_A p_1(dx_1) - q_1(dx_1) \right| \int_{A^{N-1}} p_{(2:N)}(dx_{(2:N)}) \\
&\quad + \int_A q_1(dx_1) \left| \int_{A^{N-1}} p_{(2:N)}(dx_{(2:N)}) - q_{(2:N)}(dx_{(2:N)}) \right| && \text{Triangle inequality} \\
&\leq \left| \int_A p_1(dx_1) - q_1(dx_1) \right| \\
&\quad + \left| \int_{A^{N-1}} p_{(2:N)}(dx_{(2:N)}) - q_{(2:N)}(dx_{(2:N)}) \right|. && \text{Applied } p_n(A), q_n(A) \leq 1
\end{aligned}$$

□

**Lemma 2.** Let  $\mathbf{g}$  be a vector-valued, biased estimator of  $\boldsymbol{\mu}$ , where the bias is denoted as  $\text{Bias}[\mathbf{g}] = \mathbb{E}\mathbf{g} - \boldsymbol{\mu}$  and the mean-squared error is denoted as  $\text{MSE}[\mathbf{g}] = \mathbb{E}\|\mathbf{g} - \boldsymbol{\mu}\|_2^2$ . Then, the second moment of  $\mathbf{g}$  is bounded as

$$\begin{aligned}
\textcircled{1} \quad \mathbb{E}\|\mathbf{g}\|_2^2 &\leq \mathbb{V}\mathbf{g} + \text{Bias}[\mathbf{g}]^2 + 2 \text{Bias}[\mathbf{g}] \|\boldsymbol{\mu}\|_2 + \|\boldsymbol{\mu}\|_2^2, \\
\textcircled{2} \quad \mathbb{E}\|\mathbf{g}\|_2^2 &\leq \text{MSE}[\mathbf{g}] + 2 \text{Bias}[\mathbf{g}] \|\boldsymbol{\mu}\|_2 + \|\boldsymbol{\mu}\|_2^2,
\end{aligned}$$

where  $\mathbb{V}\mathbf{g} = \mathbb{E}\|\mathbf{g} - \mathbb{E}\mathbf{g}\|_2^2$  is the variance of the estimator.

*Proof.* ❶ follows from the decomposition

$$\begin{aligned}
\mathbb{E} \left[ \|\mathbf{g}\|_2^2 \right] &= \mathbb{V}\mathbf{g} + \|\mathbb{E}\mathbf{g}\|_2^2 \\
&= \mathbb{V}\mathbf{g} + \|\mathbb{E}\mathbf{g} - \boldsymbol{\mu} + \boldsymbol{\mu}\|_2^2 \\
&= \mathbb{V}\mathbf{g} + \|\mathbb{E}\mathbf{g} - \boldsymbol{\mu}\|_2^2 + 2(\mathbb{E}\mathbf{g} - \boldsymbol{\mu})^\top \boldsymbol{\mu} + \|\boldsymbol{\mu}\|_2^2 && \text{Expanded quadratic} \\
&\leq \mathbb{V}\mathbf{g} + \|\mathbb{E}\mathbf{g} - \boldsymbol{\mu}\|_2^2 + 2\|\mathbb{E}\mathbf{g} - \boldsymbol{\mu}\|_2 \|\boldsymbol{\mu}\|_2 + \|\boldsymbol{\mu}\|_2^2 && \text{Cauchy-Schwarz inequality} \\
&= \mathbb{V}\mathbf{g} + \text{Bias}[\mathbf{g}]^2 + 2\text{Bias}[\mathbf{g}] \|\boldsymbol{\mu}\|_2 + \|\boldsymbol{\mu}\|_2^2. && \text{Definition of bias}
\end{aligned}$$

Meanwhile, by the well-known bias-variance decomposition formula of the mean-squared error, ❷ directly follows from ❶.  $\square$

**Theorem 1.** MSC (Naesseth *et al.*, 2020) is obtained by defining

$$P_\lambda^k(\boldsymbol{\eta}, d\boldsymbol{\eta}') = K_\lambda^k(\mathbf{z}, d\mathbf{z}')$$

with  $\boldsymbol{\eta}_t = \mathbf{z}_t$ , where  $K_\lambda(\mathbf{z}, \cdot)$  is the CIS kernel with  $q_{\text{def}}(\cdot; \boldsymbol{\lambda})$  as its proposal distribution. Then, given Assumption 2 and 3, the mixing rate and the gradient bounds are given as

$$d_{\text{TV}}(P_\lambda^k(\boldsymbol{\eta}, \cdot), \Pi) \leq \left(1 - \frac{N-1}{2w^* + N-2}\right)^k \quad \text{and} \quad \mathbb{E} \left[ \|\mathbf{g}_{t, \text{MSC}}\|^2 \mid \mathcal{F}_{t-1} \right] \leq L^2,$$

where  $w^* = \sup_{\mathbf{z}} \pi(\mathbf{z}) / q_{\text{def}}(\mathbf{z}; \boldsymbol{\lambda})$ .

*Proof.* MSC is described in Algorithm 4. At each iteration, it performs a single MCMC transition with the CIS kernel where it internally uses  $N$  proposals. That is,

$$\begin{aligned}
\mathbf{z}_t \mid \mathbf{z}_{t-1}, \boldsymbol{\lambda}_{t-1} &\sim K_{\boldsymbol{\lambda}_{t-1}}(\mathbf{z}_{t-1}, \cdot) \\
\mathbf{g}_{t, \text{MSC}} &= -\mathbf{s}(\boldsymbol{\lambda}, \mathbf{z}_t),
\end{aligned}$$

where  $K_{\boldsymbol{\lambda}_{t-1}}$  is the CIS kernel using  $q_{\text{def}}(\cdot; \boldsymbol{\lambda}_{t-1})$ .

**Ergodicity of the Markov Chain** The ergodic convergence rate of  $P_\lambda$  is equal to that of  $K_\lambda$ , the CIS kernel proposed by Naesseth *et al.* (2020). Although not mentioned by Naesseth *et al.* (2020), this kernel has been previously proposed as the iterated sequential importance resampling (i-SIR) by Andrieu *et al.* (2018) with its corresponding geometric convergence rate as

$$d_{\text{TV}}(P_\lambda^k(\boldsymbol{\eta}, \cdot), \Pi) = d_{\text{TV}}(K_\lambda^k(\mathbf{z}, \cdot), \pi) \leq \left(1 - \frac{N-1}{2w^* + N-2}\right)^k.$$

**Bound on the Gradient Variance** The bound on the gradient variance is straightforward given Assumption 3. For simplicity, we denote the rejection state as  $\mathbf{z}_t^{(1)} = \mathbf{z}_{t-1}$ . Then,

$$\begin{aligned}
&\mathbb{E} \left[ \|\mathbf{g}_{t, \text{MSC}}\|^2 \mid \mathcal{F}_{t-1} \right] \\
&= \mathbb{E}_{\mathbf{z}_t \sim K_{\boldsymbol{\lambda}_{t-1}}(\mathbf{z}_{t-1}, \cdot)} \left[ \|\mathbf{s}(\boldsymbol{\lambda}; \mathbf{z}_t)\|^2 \mid \boldsymbol{\lambda}_{t-1}, \mathbf{z}_{t-1} \right] \\
&= \int \sum_{n=1}^N \frac{w(\mathbf{z}_t^{(n)})}{\sum_{m=1}^N w(\mathbf{z}_t^{(m)})} \|\mathbf{s}(\boldsymbol{\lambda}; \mathbf{z}_t^{(n)})\|^2 \prod_{n=2}^N q(d\mathbf{z}_t^{(n)}; \boldsymbol{\lambda}_{t-1}) && \text{Andrieu et al. (2018)} \\
&\leq L^2 \int \sum_{n=1}^N \frac{w(\mathbf{z}_t^{(n)})}{\sum_{m=1}^N w(\mathbf{z}_t^{(m)})} \prod_{n=2}^N q(d\mathbf{z}_t^{(n)}; \boldsymbol{\lambda}_{t-1}) && \text{Assumption 3} \\
&= L^2 \int \prod_{n=2}^N q(d\mathbf{z}_t^{(n)}; \boldsymbol{\lambda}_{t-1}) \\
&= L^2.
\end{aligned}$$

$\square$

**Lemma 3.** Let the importance weight be defined as  $w(\mathbf{z}) = \pi(\mathbf{z})/q(\mathbf{z})$ . The variance of the importance weights is related to the  $\chi^2$  divergence as

$$\mathbb{V}_q w(\mathbf{z}) = d_{\chi^2}(\pi \parallel q).$$

*Proof.*

$$\mathbb{V}_q w(\mathbf{z}) = \mathbb{E}_q \left[ (w(\mathbf{z}) - \mathbb{E}_q[w(\mathbf{z})])^2 \right] = \mathbb{E}_q \left[ (w(\mathbf{z}) - 1)^2 \right] = \int \left( \frac{\pi(\mathbf{z})}{q(\mathbf{z})} - 1 \right)^2 q(d\mathbf{z}) = d_{\chi^2}(\pi \parallel q).$$

□

**Theorem 2.** (Cardoso *et al.*, 2022) The gradient variance of MSC-RB is bounded as

$$\mathbb{E} \left[ \|\mathbf{g}_{t,\text{MSC-RB}}\|_2^2 \mid \mathcal{F}_{t-1} \right] \leq 4L^2 \left[ \frac{1}{N-1} d_{\chi^2}(\pi \parallel q(\cdot; \boldsymbol{\lambda}_{t-1})) + \mathcal{O}(N^{-3/2} + \gamma^{t-1}/N-1) \right] + \|\boldsymbol{\mu}\|_2^2,$$

where  $\boldsymbol{\mu} = \mathbb{E}_\pi \mathbf{s}(\boldsymbol{\lambda}; \mathbf{z})$ ,  $\gamma = 2w^*/(2w^* + N - 2)$  is the mixing rate of the Rao-Blackwellized CIS kernel, and  $d_{\chi^2}(\pi \parallel q) = \int (\pi/q - 1)^2 q(d\mathbf{z})$  is the  $\chi^2$  divergence.

*Proof.* Rao-Blackwellization of the CIS kernel is to reuse the importance weights  $w(\mathbf{z}) = \pi(\mathbf{z})/q_{\text{def}}(\mathbf{z})$  internally used by the kernel when forming the estimator. That is, the gradient is estimated as

$$\begin{aligned} \mathbf{z}_t^{(n)} \mid \boldsymbol{\lambda}_{t-1} &\sim q(\cdot; \boldsymbol{\lambda}_{t-1}) \\ \mathbf{g}_{t,\text{MSC-RB}} &= - \sum_{n=2}^N \frac{w(\mathbf{z}_t^{(n)})}{\sum_{m=2}^N w(\mathbf{z}_t^{(m)}) + w(\mathbf{z}_{t-1})} \mathbf{s}(\mathbf{z}_t^{(n)}) + \frac{w(\mathbf{z}_{t-1})}{\sum_{m=2}^N w(\mathbf{z}_t^{(m)}) + w(\mathbf{z}_{t-1})} \mathbf{s}(\mathbf{z}_{t-1}). \end{aligned}$$

By Lemma 2, the second moment of the gradient is bounded as

$$\begin{aligned} \mathbb{E} \left[ \|\mathbf{g}_{t,\text{MSC-RB}}\|_2^2 \mid \mathcal{F}_{t-1} \right] &= \text{MSE} \left[ \mathbf{g}_{t,\text{MSC-RB}} \mid \mathcal{F}_{t-1} \right] + 2 \text{Bias} \left[ \mathbf{g}_{t,\text{MSC-RB}} \mid \mathcal{F}_{t-1} \right]^\top \boldsymbol{\mu} + \|\boldsymbol{\mu}\|_2^2 \\ &\leq \text{MSE} \left[ \mathbf{g}_{t,\text{MSC-RB}} \mid \mathcal{F}_{t-1} \right] + 2L \text{Bias} \left[ \mathbf{g}_{t,\text{MSC-RB}} \mid \mathcal{F}_{t-1} \right] + \|\boldsymbol{\mu}\|_2^2. \end{aligned} \quad (6)$$

Cardoso *et al.* (2022, Theorem 3) show that the mean-squared error of this estimator, which they call bias reduced self-normalized importance sampling, is bounded as

$$\begin{aligned} \text{MSE} \left[ \mathbf{g}_{t,\text{MSC-RB}} \mid \mathcal{F}_{t-1} \right] &\leq 4L^2 \left[ (1 + \epsilon^2) \frac{1}{N-1} \mathbb{V}_{\mathbf{z} \sim q_{\text{def}}(\cdot; \boldsymbol{\lambda}_{t-1})} [w(\mathbf{z}) \mid \boldsymbol{\lambda}_{t-1}] \right. \\ &\quad \left. + (1 + \epsilon^{-2}) \frac{1}{N^2} (1 + w^*)^2 \right], \end{aligned}$$

for some arbitrary constant  $\epsilon^2$ . The first term is identical to the variance of an  $N - 1$ -sample self-normalized importance sampling estimator (Agapiou *et al.*, 2017), while the second term is the added variance due to “rejections.”

Since the variance of the importance weights is well known to be related to the  $\chi^2$  divergence,

$$\begin{aligned} \text{MSE} \left[ \mathbf{g}_{t,\text{MSC-RB}} \mid \mathcal{F}_{t-1} \right] &\leq 4L^2 \left[ (1 + \epsilon^2) \frac{1}{N-1} d_{\chi^2}(\pi \parallel q(\cdot; \boldsymbol{\lambda}_{t-1})) \right. \\ &\quad \left. + (1 + \epsilon^{-2}) \frac{1}{N^2} (1 + w^*)^2 \right]. \end{aligned} \quad \text{Lemma 3}$$

For  $\epsilon^2$ , Cardoso *et al.* choose  $\epsilon^2 = (N - 1)^{-1/2}$ , which results in their stated bound

$$\text{MSE} \left[ \mathbf{g}_{t,\text{MSC-RB}} \mid \mathcal{F}_{t-1} \right] \leq 4L^2 \left[ \frac{1}{N-1} d_{\chi^2}(\pi \parallel q(\cdot; \boldsymbol{\lambda}_{t-1})) + \mathcal{O}(N^{-3/2}) \right].$$

Furthermore, they show that the bias term is bounded as

$$\text{Bias} \left[ \mathbf{g}_{t,\text{MSC-RB}} \right] \leq \frac{4L}{N-1} (d_{\chi^2}(\pi \parallel q(\cdot; \boldsymbol{\lambda}_{t-1})) + 1 + w^*) \left( \frac{2w^*}{2w^* + N - 2} \right)^{t-1}.$$

Combining both the bias and the mean-squared error to Equation (6), we obtain the bound

$$\begin{aligned}
& \mathbb{E} \left[ \|\mathbf{g}_{t,\text{MSC-RB}}\|_2^2 \mid \mathcal{F}_{t-1} \right] \\
& \leq 4L^2 \left[ \frac{1}{N-1} d_{\chi^2}(\pi \parallel q(\cdot; \boldsymbol{\lambda}_{t-1})) \right. \\
& \quad \left. + \frac{1}{N-1} (d_{\chi^2}(\pi \parallel q(\cdot; \boldsymbol{\lambda}_{t-1})) + 1 + w^*) \left( \frac{2w^*}{2w^* + N - 2} \right)^{t-1} + \mathcal{O}(N^{-3/2}) \right] \\
& = 4L^2 \left[ \frac{1 + \gamma^{t-1}}{N-1} d_{\chi^2}(\pi \parallel q(\cdot; \boldsymbol{\lambda}_{t-1})) + \frac{\gamma^{t-1}}{N-1} + \frac{\gamma^{t-1} w^*}{N-1} + \mathcal{O}(N^{-3/2}) \right].
\end{aligned}$$

□

**Lemma 4.** For  $w^* = \sup_{\mathbf{z}} w(\mathbf{z})$ ,  $\lambda(\cdot)$  in Equation (3) is bounded as

$$\max\left(1 - \frac{1}{w}, 0\right) \leq \lambda(w) \leq 1 - \frac{1}{w^*}.$$

*Proof.* The proof can be found in the proof of Theorem 3 of Smith & Tierney (1996). □

**Lemma 5.** For  $w^* = \sup_{\mathbf{z}} w(\mathbf{z})$ ,  $T_n(\cdot)$  in Equation (3) is bounded as

$$T_n(w) \leq \frac{n}{w} \left(1 - \frac{1}{w^*}\right)^{n-1}.$$

*Proof.*

$$\begin{aligned}
T_n(w) &= \int_w^\infty \frac{n}{v^2} \lambda^{n-1}(v) dv && \text{Equation (3)} \\
&\leq \int_w^\infty \frac{n}{v^2} \left(1 - \frac{1}{w^*}\right)^{n-1} dv && \text{Lemma 4} \\
&= n \left(1 - \frac{1}{w^*}\right)^{n-1} \int_w^\infty \frac{1}{v^2} dv \\
&= n \left(1 - \frac{1}{w^*}\right)^{n-1} \left(-\frac{1}{v}\Big|_w^\infty\right) \\
&= \frac{n}{w} \left(1 - \frac{1}{w^*}\right)^{n-1}.
\end{aligned}$$

□

**Lemma 6.** For a positive test function  $f : \mathcal{Z} \rightarrow \mathbb{R}^+$ , the estimate of a  $\pi$ -invariant independent Metropolis-Hastings kernel  $K$  with a proposal  $q$  is bounded as

$$\mathbb{E}_{K^n(\mathbf{z}, \cdot)} [f \mid \mathbf{z}] \leq n r^{n-1} \mathbb{E}_q [f] + r^n f(\mathbf{z}),$$

where  $w(\mathbf{z}) = \pi(\mathbf{z})/q(\mathbf{z})$  and  $r = 1 - 1/w^*$  for  $w^* = \sup_{\mathbf{z}} w(\mathbf{z})$ .

*Proof.*

$$\begin{aligned}
& \mathbb{E}_{K^n(\mathbf{z}, \cdot)} [f \mid \mathbf{z}] \\
&= \int T_n(w(\mathbf{z}) \vee w(\mathbf{z}')) f(\mathbf{z}') \pi(\mathbf{z}') d\mathbf{z}' + \lambda^n(w(\mathbf{z})) f(\mathbf{z}) && \text{Equation (2)} \\
&\leq \int \frac{n}{w(\mathbf{z}) \vee w(\mathbf{z}')} \left(1 - \frac{1}{w^*}\right)^{n-1} f(\mathbf{z}') \pi(\mathbf{z}') d\mathbf{z}' + \lambda^n(w(\mathbf{z})) f(\mathbf{z}) && \text{Lemma 5} \\
&\leq \int \frac{n}{w(\mathbf{z}')} \left(1 - \frac{1}{w^*}\right)^{n-1} f(\mathbf{z}') \pi(\mathbf{z}') d\mathbf{z}' + \lambda^n(w(\mathbf{z})) f(\mathbf{z}) && \frac{1}{w(\mathbf{z}) \vee w(\mathbf{z}')} \leq \frac{1}{w(\mathbf{z}')}
\end{aligned}$$



$$\begin{aligned}
&= n \left(1 - \frac{1}{w^*}\right)^{n-1} \int \frac{1}{w(\mathbf{z}')} f(\mathbf{z}') \pi(\mathbf{z}') d\mathbf{z}' + \lambda^n (w(\mathbf{z})) f(\mathbf{z}) \\
&= n \left(1 - \frac{1}{w^*}\right)^{n-1} \int f(\mathbf{z}') q(\mathbf{z}') d\mathbf{z}' + \lambda^n (w(\mathbf{z})) f(\mathbf{z}) && \text{Definition of } w(\mathbf{z}) \\
&\leq n \left(1 - \frac{1}{w^*}\right)^{n-1} \int f(\mathbf{z}') q(\mathbf{z}') d\mathbf{z}' + \left(1 - \frac{1}{w^*}\right)^n f(\mathbf{z}) && \text{Lemma 4} \\
&= n \left(1 - \frac{1}{w^*}\right)^{n-1} \mathbb{E}_q[f] + \left(1 - \frac{1}{w^*}\right)^n f(\mathbf{z}).
\end{aligned}$$

□

**Lemma 7.** Let a  $\Pi$ -invariant Markov chain kernel  $P$  be geometrically ergodic as

$$d_{\text{TV}}(P^n(\eta_0, \cdot), \Pi) \leq C \rho^n.$$

Furthermore, let  $\hat{\mathbf{g}} = \mathbf{g}(\boldsymbol{\eta})$  with  $\boldsymbol{\eta} \sim P^n(\eta_0, \cdot)$  be the estimator of  $\mathbb{E}_{\Pi} \mathbf{g}$  for some function  $\mathbf{g} : \mathbb{H} \rightarrow \mathbb{R}^D$  bounded as  $\|\mathbf{g}\|_2 \leq L$ . The bias of  $\hat{\mathbf{g}}$ , defined as  $\text{Bias}[\hat{\mathbf{g}}] = \mathbb{E} \|\hat{\mathbf{g}} - \mathbb{E}_{\pi} \mathbf{g}\|$ , is bounded as

$$\text{Bias}[\hat{\mathbf{g}}] \leq 2\sqrt{D} L C \rho^n.$$

*Proof.*

$$\begin{aligned}
\text{Bias}[\hat{\mathbf{g}}] &= \left\| \mathbb{E}_{P^n(\eta_0, \cdot)} \mathbf{g} - \mathbb{E}_{\Pi} \mathbf{g} \right\|_2 \\
&\leq \sqrt{D} \left\| \mathbb{E}_{P^n(\eta_0, \cdot)} \mathbf{g} - \mathbb{E}_{\Pi} \mathbf{g} \right\|_{\infty} && \text{for } \mathbf{x} \in \mathbb{R}^D, \|\mathbf{x}\|_2 \leq \sqrt{D} \|\mathbf{x}\|_{\infty} \\
&\leq \sqrt{D} L \sup_{|h| \leq 1} \left| \mathbb{E}_{P^n(\eta_0, \cdot)} h - \mathbb{E}_{\Pi} h \right| && \|\mathbf{g}\|_{\infty} \leq \|\mathbf{g}\|_2 \leq L \\
&= 2\sqrt{D} L d_{\text{TV}}(P^n(\eta_0, \cdot), \Pi) && \text{Definition of } d_{\text{TV}} \\
&= 2\sqrt{D} L C \rho^n. && \text{Geometric ergodicity}
\end{aligned}$$

□

**Theorem 3.** JSA (Ou & Song, 2020) is obtained by defining

$$P_{\lambda}^k(\boldsymbol{\eta}, d\boldsymbol{\eta}') = K_{\lambda}^{N(k-1)+1}(\mathbf{z}^{(1)}, d\mathbf{z}'^{(1)}) K_{\lambda}^{N(k-1)+2}(\mathbf{z}^{(2)}, d\mathbf{z}'^{(2)}) \cdots K_{\lambda}^{N(k-1)+N}(\mathbf{z}^{(N)}, d\mathbf{z}'^{(N)})$$

with  $\boldsymbol{\eta}_t = (\mathbf{z}_t^{(1)}, \mathbf{z}_t^{(2)}, \dots, \mathbf{z}_t^{(N)})$ . Then, given Assumption 2 and 3, the mixing rate and the gradient variance bounds are

$$d_{\text{TV}}(P_{\lambda}^k(\boldsymbol{\eta}, \cdot), \Pi) \leq C(r, N) r^{kN} \text{ and } \mathbb{E} \left[ \|\mathbf{g}_{t, \text{JSA}}\|_2^2 \mid \mathcal{F}_{t-1} \right] \leq L^2 \left[ \frac{1}{2} + \frac{3}{2} \frac{1}{N} + \mathcal{O}(1/w^* + r^t N) \right] + C_{\text{cov}} + \|\boldsymbol{\mu}\|_2^2,$$

where  $\boldsymbol{\mu} = \mathbb{E}_{\pi} \mathbf{s}(\boldsymbol{\lambda}; \mathbf{z})$ ,  $C_{\text{cov}} = \frac{2}{N^2} \sum_{n=2}^N \sum_{m=1}^{n-1} \text{Cov}(\mathbf{s}(\boldsymbol{\lambda}; \mathbf{z}_t^{(n)}), \mathbf{s}(\boldsymbol{\lambda}; \mathbf{z}_t^{(m)}) \mid \mathcal{F}_{t-1})$  is the sum of the covariance between the samples,  $w^* = \sup_{\mathbf{z}} \pi(\mathbf{z})/q_{\text{def}}(\mathbf{z}; \boldsymbol{\lambda})$ , and  $C(r, N) > 0$  is a finite constant.

*Proof.* JSA is described in Algorithm 5. At each iteration, it performs  $N$  MCMC transitions and uses the  $N$  intermediate states to estimate the gradient. That is,

$$\begin{aligned}
\mathbf{z}_t^{(1)} \mid \mathbf{z}_{t-1}^{(N)}, \boldsymbol{\lambda}_{t-1} &\sim K_{\boldsymbol{\lambda}_{t-1}}(\mathbf{z}_{t-1}^{(N)}, \cdot) \\
\mathbf{z}_t^{(2)} \mid \mathbf{z}_t^{(1)}, \boldsymbol{\lambda}_{t-1} &\sim K_{\boldsymbol{\lambda}_{t-1}}(\mathbf{z}_t^{(1)}, \cdot) \\
&\vdots \\
\mathbf{z}_t^{(N)} \mid \mathbf{z}_t^{(N-1)}, \boldsymbol{\lambda}_{t-1} &\sim K_{\boldsymbol{\lambda}_{t-1}}(\mathbf{z}_t^{(N-1)}, \cdot) \\
\mathbf{g}_{t, \text{JSA}} &= -\frac{1}{N} \sum_{n=1}^N \mathbf{s}(\boldsymbol{\lambda}, \mathbf{z}_t^{(n)}),
\end{aligned}$$

where  $K_{\lambda_{t-1}}^n$  is an  $n$ -transition IMH kernel using  $q_{\text{def}}(\cdot; \boldsymbol{\lambda}_{t-1})$ . Under [Assumption 2](#), an IMH kernel is uniformly geometrically ergodic ([Mengersen & Tweedie, 1996](#); [Wang, 2022](#)) as

$$d_{\text{TV}}(K_{\lambda}^k(\mathbf{z}, \cdot), \pi) \leq r^k \quad (7)$$

for any  $\mathbf{z} \in \mathcal{Z}$ .

**Ergodicity of the Markov Chain** The state transitions of the Markov chain samples  $\mathbf{z}^{(1:N)}$  are visualized as

|          | $\mathbf{z}_t^{(1)}$                                          | $\mathbf{z}_t^{(2)}$                                          | $\mathbf{z}_t^{(3)}$                                          | ... | $\mathbf{z}_t^{(N)}$                                          |
|----------|---------------------------------------------------------------|---------------------------------------------------------------|---------------------------------------------------------------|-----|---------------------------------------------------------------|
| $t = 1$  | $K_{\lambda_1}(\mathbf{z}_0, d\mathbf{z}_1^{(1)})$            | $K_{\lambda_1}^2(\mathbf{z}_0, d\mathbf{z}_1^{(2)})$          | $K_{\lambda_1}^3(\mathbf{z}_0, d\mathbf{z}_1^{(3)})$          | ... | $K_{\lambda_1}^N(\mathbf{z}_0, d\mathbf{z}_1^{(N)})$          |
| $t = 2$  | $K_{\lambda_2}^{N+1}(\mathbf{z}_0, d\mathbf{z}_2^{(1)})$      | $K_{\lambda_2}^{N+2}(\mathbf{z}_0, d\mathbf{z}_2^{(2)})$      | $K_{\lambda_2}^{N+3}(\mathbf{z}_0, d\mathbf{z}_2^{(3)})$      | ... | $K_{\lambda_2}^{2N}(\mathbf{z}_0, d\mathbf{z}_2^{(N)})$       |
| $\vdots$ |                                                               |                                                               | $\vdots$                                                      |     |                                                               |
| $t = k$  | $K_{\lambda_k}^{(k-1)N+1}(\mathbf{z}_0, d\mathbf{z}_k^{(1)})$ | $K_{\lambda_k}^{(k-1)N+2}(\mathbf{z}_0, d\mathbf{z}_k^{(2)})$ | $K_{\lambda_k}^{(k-1)N+3}(\mathbf{z}_0, d\mathbf{z}_k^{(3)})$ | ... | $K_{\lambda_k}^{(k-1)N+N}(\mathbf{z}_0, d\mathbf{z}_k^{(N)})$ |

where  $K_{\lambda}(\mathbf{z}, \cdot)$  is an IMH kernel. Therefore, the  $n$ -step transition kernel for the vector of the Markov-chain samples  $\boldsymbol{\eta} = \mathbf{z}^{(1:N)}$  is represented as

$$P_{\lambda}^k(\boldsymbol{\eta}, d\boldsymbol{\eta}') = K_{\lambda}^{N(k-1)+1}(\mathbf{z}_1, d\mathbf{z}'_1) K_{\lambda}^{N(k-1)+2}(\mathbf{z}_2, d\mathbf{z}'_2) \cdots K_{\lambda}^{N(k-1)+N}(\mathbf{z}_N, d\mathbf{z}'_N).$$

Now, the convergence in total variation  $d_{\text{TV}}(\cdot, \cdot)$  can be shown to decrease geometrically as

$$\begin{aligned} & d_{\text{TV}}(P_{\lambda}^k(\boldsymbol{\eta}, \cdot), \Pi) \\ &= \sup_A |\Pi(A) - P^k(\boldsymbol{\eta}, A)| \\ &\leq \sup_A \left| \int_A \pi(d\mathbf{z}'^{(1)}) \times \cdots \times \pi(d\mathbf{z}'^{(N)}) \right. \\ &\quad \left. - K_{\lambda}^{(k-1)N+1}(\mathbf{z}^{(1)}, d\mathbf{z}'^{(1)}) \times \cdots \times K_{\lambda}^{kN}(\mathbf{z}^{(N)}, d\mathbf{z}'^{(N)}) \right| \quad \text{Definition of } d_{\text{TV}} \\ &\leq \sup_A \sum_{n=1}^N \left| \int_A \pi(d\mathbf{z}^{(n)}) - K_{\lambda}^{(k-1)N+n}(\mathbf{z}^{(n)}, d\mathbf{z}'^{(n)}) \right| \quad \text{Lemma 1} \\ &= \sum_{n=1}^N d_{\text{TV}}(K_{\lambda}^{(k-1)N+n}(\mathbf{z}^{(n)}, \cdot), \pi) \quad \text{Definition of } d_{\text{TV}} \\ &\leq \sum_{n=1}^N r^{(k-1)N+n} \quad \text{Equation (7)} \\ &= r^{kN} r^{-N} \frac{r - r^{N+1}}{1 - r} \\ &= \frac{r(1 - r^N)}{r^N(1 - r)} (r^N)^k. \end{aligned}$$

Although the constant depends on  $r$  and  $N$ , the kernel  $P$  is geometrically ergodic and converges  $N$  times faster than the base kernel  $K$ .

**Bound on the Gradient Variance** To analyze the variance of the gradient, we require detailed information about the  $n$ -step marginal transition kernel, which is unavailable for most MCMC kernels. Fortunately, specifically for the IMH kernel, [Smith & Tierney \(1996\)](#) have shown that the  $n$ -step marginal IMH kernel is given as [Equation \(2\)](#).

Furthermore, by [Lemma 2](#), the second moment of the gradient is bounded as

$$\mathbb{E} \left[ \|\mathbf{g}_{t, \text{JSA}}\|_2^2 \mid \mathcal{F}_{t-1} \right] = \mathbb{V} \left[ \mathbf{g}_{t, \text{JSA}} \mid \mathcal{F}_{t-1} \right] + \text{Bias} \left[ \mathbf{g}_{t, \text{JSA}} \mid \mathcal{F}_{t-1} \right]^2 + 2 \text{Bias} \left[ \mathbf{g}_{t, \text{JSA}} \mid \mathcal{F}_{t-1} \right] \|\boldsymbol{\mu}\|_2 + \|\boldsymbol{\mu}\|_2^2$$

$$\leq \mathbb{V}[\mathbf{g}_{t,\text{JSA}} | \mathcal{F}_{t-1}] + \text{Bias}[\mathbf{g}_{t,\text{JSA}} | \mathcal{F}_{t-1}]^2 + 2L \text{Bias}[\mathbf{g}_{t,\text{JSA}} | \mathcal{F}_{t-1}] + \|\boldsymbol{\mu}\|_2^2,$$

where  $\boldsymbol{\mu} = \mathbb{E}_{\pi} \mathbf{s}(\boldsymbol{\lambda}; \mathbf{z})$ . As shown in [Lemma 7](#), the bias terms decreases in a rate of  $r^{tN}$ . Therefore,

$$\mathbb{E}[\|\mathbf{g}_{t,\text{JSA}}\|_2^2 | \mathcal{F}_{t-1}] \leq \mathbb{V}[\mathbf{g}_{t,\text{JSA}} | \mathcal{F}_{t-1}] + \|\boldsymbol{\mu}\|_2^2 + \mathcal{O}(r^{tN}). \quad \text{Lemma 7}$$

Note that it is possible to obtain a tighter bound on the bias terms such that  $\mathcal{O}(r^{tN}/N)$ , if we directly use  $(K, \mathbf{z})$  to bound the bias instead of the higher-level  $(P, \boldsymbol{\eta})$  abstraction. The extra looseness comes from the use of [Lemma 1](#).

For the variance term, we show that

$$\begin{aligned} & \mathbb{V}[\mathbf{g}_{t,\text{JSA}} | \mathcal{F}_{t-1}] \\ &= \mathbb{V}\left[\frac{1}{N} \sum_{n=1}^N \mathbf{s}(\boldsymbol{\lambda}; \mathbf{z}_t^{(n)}) \middle| \mathcal{F}_{t-1}\right] \\ &= \frac{1}{N^2} \sum_{n=1}^N \mathbb{V}[\mathbf{s}(\boldsymbol{\lambda}; \mathbf{z}_t^{(n)}) | \mathcal{F}_{t-1}] + \frac{2}{N^2} \sum_{n=2}^N \sum_{m=1}^{n-1} \text{Cov}(\mathbf{s}(\boldsymbol{\lambda}; \mathbf{z}_t^{(n)}), \mathbf{s}(\boldsymbol{\lambda}; \mathbf{z}_t^{(m)}) | \mathcal{F}_{t-1}) \\ &\leq \frac{1}{N^2} \sum_{n=1}^N \mathbb{E}\left[\|\mathbf{s}(\boldsymbol{\lambda}; \mathbf{z}_t^{(n)})\|_2^2 \middle| \mathcal{F}_{t-1}\right] + C_{\text{cov}} \\ &= \frac{1}{N^2} \sum_{n=1}^N \mathbb{E}\left[\|\mathbf{s}(\boldsymbol{\lambda}; \mathbf{z}_t^{(n)})\|_2^2 \middle| \mathbf{z}_{t-1}^{(N)}, \boldsymbol{\lambda}_{t-1}\right] + C_{\text{cov}} \\ &= \frac{1}{N^2} \sum_{n=1}^N \mathbb{E}_{\mathbf{z}_t^{(n)} \sim K_{\boldsymbol{\lambda}_{t-1}}^n(\mathbf{z}_{t-1}, \cdot)}\left[\|\mathbf{s}(\boldsymbol{\lambda}; \mathbf{z}_t^{(n)})\|_2^2 \middle| \mathbf{z}_{t-1}^{(N)}, \boldsymbol{\lambda}_{t-1}\right] + C_{\text{cov}} \\ &\leq \frac{1}{N^2} \sum_{n=1}^N \left[ n r^{n-1} \mathbb{E}_{\mathbf{z} \sim q_{\text{def}}(\cdot; \boldsymbol{\lambda}_{t-1})}[\|\mathbf{s}(\boldsymbol{\lambda}; \mathbf{z})\|_2^2] + r^n \|\mathbf{s}(\boldsymbol{\lambda}; \mathbf{z}_{t-1}^{(N)})\|_2^2 \right] + C_{\text{cov}} \quad \text{Lemma 6} \\ &\leq \frac{1}{N^2} \sum_{n=1}^N [n r^{n-1} L^2 + r^n L^2] + C_{\text{cov}} \quad \text{Assumption 3} \\ &= \frac{L^2}{N^2} \sum_{n=1}^N \left[ n \left(1 - \frac{1}{w^*}\right)^{n-1} + \left(1 - \frac{1}{w^*}\right)^n \right] + C_{\text{cov}} \\ &= \frac{L^2}{N^2} \left[ (w^*)^2 + w^* - \left(1 - \frac{1}{w^*}\right)^N ((w^*)^2 + w^* + N w^*) \right] + C_{\text{cov}} \\ &= \frac{L^2}{N^2} \left[ \frac{1}{2} N^2 + \frac{3}{2} N + \mathcal{O}(1/w^*) \right] + C_{\text{cov}} \quad \text{Laurent series expansion at } w^* \rightarrow \infty \\ &= L^2 \left[ \frac{1}{2} + \frac{3}{2} \frac{1}{N} + \mathcal{O}(1/w^*) \right] + C_{\text{cov}}, \end{aligned}$$

where

$$C_{\text{cov}} = \frac{2}{N^2} \sum_{n=2}^N \sum_{m=1}^{n-1} \text{Cov}(\mathbf{s}(\boldsymbol{\lambda}; \mathbf{z}_t^{(n)}), \mathbf{s}(\boldsymbol{\lambda}; \mathbf{z}_t^{(m)}) | \mathbf{z}_{t-1}^{(N)}, \boldsymbol{\lambda}_{t-1}).$$

The Laurent approximation becomes exact as  $w^* \rightarrow \infty$ , which is useful considering [Proposition 2](#).  $\square$

**Theorem 4.** pMCSA, our proposed scheme, is obtained by setting

$$P_{\lambda}^k(\boldsymbol{\eta}, d\boldsymbol{\eta}') = K_{\lambda}^k(\mathbf{z}^{(1)}, d\mathbf{z}'^{(1)}) K_{\lambda}^k(\mathbf{z}^{(2)}, d\mathbf{z}'^{(2)}) \cdot \dots \cdot K_{\lambda}^k(\mathbf{z}^{(N)}, d\mathbf{z}'^{(N)})$$

with  $\boldsymbol{\eta} = (\mathbf{z}^{(1)}, \mathbf{z}^{(2)}, \dots, \mathbf{z}^{(N)})$ . Then, given [Assumption 2](#) and [3](#), the mixing rate and the gradient variance bounds are

$$d_{\text{TV}}(P_{\lambda}^k(\boldsymbol{\eta}, \cdot), \Pi) \leq C(N) r^k \quad \text{and} \quad \mathbb{E}[\|\mathbf{g}_{t,\text{pMCSA}}\|_2^2 | \mathcal{F}_{t-1}] \leq L^2 \left[ \frac{1}{N} + \frac{1}{N} \left(1 - \frac{1}{w^*}\right) \right] + \mathcal{O}(r^t) + \|\boldsymbol{\mu}\|_2^2,$$

where  $\boldsymbol{\mu} = \mathbb{E}_{\pi} \mathbf{s}(\boldsymbol{\lambda}; \mathbf{z})$ ,  $w^* = \sup_{\mathbf{z}} \pi(\mathbf{z})/q_{\text{def}}(\mathbf{z}; \boldsymbol{\lambda})$  and  $C(N) > 0$  is a finite constant.

*Proof.* Our proposed scheme, pMCSA, is described in [Algorithm 5](#). At each iteration, our scheme performs a single MCMC transition for each of the  $N$  samples, or chains, to estimate the gradient. That is,

$$\begin{aligned} \mathbf{z}_t^{(1)} \mid \mathbf{z}_{t-1}^{(1)}, \boldsymbol{\lambda}_{t-1} &\sim K_{\boldsymbol{\lambda}_{t-1}}(\mathbf{z}_{t-1}^{(1)}, \cdot) \\ \mathbf{z}_t^{(2)} \mid \mathbf{z}_{t-1}^{(2)}, \boldsymbol{\lambda}_{t-1} &\sim K_{\boldsymbol{\lambda}_{t-1}}(\mathbf{z}_{t-1}^{(2)}, \cdot) \\ &\vdots \\ \mathbf{z}_t^{(N)} \mid \mathbf{z}_{t-1}^{(N)}, \boldsymbol{\lambda}_{t-1} &\sim K_{\boldsymbol{\lambda}_{t-1}}(\mathbf{z}_{t-1}^{(N)}, \cdot) \\ \mathbf{g}_{t,\text{pMCSA}} &= -\frac{1}{N} \sum_{n=1}^N \mathbf{s}(\boldsymbol{\lambda}, \mathbf{z}_t^{(n)}), \end{aligned}$$

where  $K_{\boldsymbol{\lambda}_{t-1}}^n$  is an  $n$ -transition IMH kernel using  $q_{\text{def}}(\cdot; \boldsymbol{\lambda}_{t-1})$ .

**Ergodicity of the Markov Chain** Since our kernel operates the same MCMC kernel  $K_\lambda$  for each of the  $N$  parallel Markov chains, the  $n$ -step marginal kernel  $P_\lambda$  can be represented as

$$P_\lambda^k(\boldsymbol{\eta}, d\boldsymbol{\eta}') = K_\lambda^k(\mathbf{z}^{(1)}, d\mathbf{z}'^{(1)}) K_\lambda^k(\mathbf{z}^{(2)}, d\mathbf{z}'^{(2)}) \cdot \dots \cdot K_\lambda^k(\mathbf{z}^{(N)}, d\mathbf{z}'^{(N)}).$$

Then, the convergence in total variation  $d_{\text{TV}}(\cdot, \cdot)$  can be shown to decrease geometrically as

$$\begin{aligned} &d_{\text{TV}}(K_\lambda^k(\boldsymbol{\eta}, \cdot), \Pi) \\ &= \sup_A |\Pi(A) - P_\lambda^k(\boldsymbol{\eta}, A)| && \text{Definition of } d_{\text{TV}} \\ &\leq \sup_A \left| \int_A \pi(d\mathbf{z}'_1) \cdot \dots \cdot \pi(d\mathbf{z}'_N) \right. \\ &\quad \left. - K_\lambda^k(\mathbf{z}_1, d\mathbf{z}'_1) \cdot \dots \cdot K_\lambda^k(\mathbf{z}_N, d\mathbf{z}'_N) \right| \\ &\leq \sup_A \sum_{n=1}^N \left| \int_A \pi(d\mathbf{z}'_k) - K_\lambda^k(\mathbf{z}_n, d\mathbf{z}'_n) \right| && \text{Lemma 1} \\ &= \sum_{n=1}^N d_{\text{TV}}(K_\lambda^k(\mathbf{z}_n, \cdot), \pi) && \text{Equation (7)} \\ &\leq \sum_{n=1}^N r^k && \text{Geometric ergodicity} \\ &= N r^k. \end{aligned}$$

**Bound on the Gradient Variance** By [Lemma 2](#), the second moment of the gradient is bounded as

$$\begin{aligned} \mathbb{E} \left[ \|\mathbf{g}_{t,\text{pMCSA}}\|_2^2 \mid \mathcal{F}_{t-1} \right] &= \mathbb{V} \left[ \mathbf{g}_{t,\text{pMCSA}} \mid \mathcal{F}_{t-1} \right] + \text{Bias} \left[ \mathbf{g}_{t,\text{pMCSA}} \mid \mathcal{F}_{t-1} \right]^2 + 2 \text{Bias} \left[ \mathbf{g}_{t,\text{pMCSA}} \mid \mathcal{F}_{t-1} \right] \|\boldsymbol{\mu}\|_2 + \|\boldsymbol{\mu}\|_2^2 \\ &\leq \mathbb{V} \left[ \mathbf{g}_{t,\text{pMCSA}} \mid \mathcal{F}_{t-1} \right] + \text{Bias} \left[ \mathbf{g}_{t,\text{pMCSA}} \mid \mathcal{F}_{t-1} \right]^2 + 2L \text{Bias} \left[ \mathbf{g}_{t,\text{pMCSA}} \mid \mathcal{F}_{t-1} \right] + \|\boldsymbol{\mu}\|_2^2, \end{aligned}$$

where  $\boldsymbol{\mu} = \mathbb{E}_\pi \mathbf{s}(\boldsymbol{\lambda}; \mathbf{z})$ . As shown in [Lemma 7](#), the bias terms decreases in a rate of  $r^t$ . Therefore,

$$\mathbb{E} \left[ \|\mathbf{g}_{t,\text{pMCSA}}\|_2^2 \mid \mathcal{F}_{t-1} \right] \leq \mathbb{V} \left[ \mathbf{g}_{t,\text{pMCSA}} \mid \mathcal{F}_{t-1} \right] + \|\boldsymbol{\mu}\|_2^2 + \mathcal{O}(r^t). \quad \text{Lemma 7}$$

As noted in the proof of [Theorem 3](#), it is possible to obtain a tighter bound on the bias terms such that  $\mathcal{O}(r^t/N)$ .

The variance term is bounded as

$$\begin{aligned} &\mathbb{V} \left[ \mathbf{g}_{t,\text{pMCSA}} \mid \mathcal{F}_{t-1} \right] \\ &= \mathbb{V} \left[ \frac{1}{N} \sum_{n=1}^N \mathbf{s}(\boldsymbol{\lambda}; \mathbf{z}_t^{(n)}) \mid \mathbf{z}_{t-1}^{(1:N)}, \boldsymbol{\lambda}_{t-1} \right] \end{aligned}$$

$$\begin{aligned}
&= \frac{1}{N^2} \sum_{n=1}^N \mathbb{V} \left[ \mathbf{s}(\boldsymbol{\lambda}; \mathbf{z}_t^{(n)}) \mid \mathbf{z}_{t-1}^{(1:N)}, \boldsymbol{\lambda}_{t-1} \right] && \mathbf{z}_t^{(i)} \perp \mathbf{z}_t^{(j)} \text{ for } i \neq j \\
&\leq \frac{1}{N^2} \sum_{n=1}^N \mathbb{E} \left[ \left\| \mathbf{s}(\boldsymbol{\lambda}; \mathbf{z}_t^{(n)}) \right\|_2^2 \mid \mathbf{z}_{t-1}^{(1:N)}, \boldsymbol{\lambda}_{t-1} \right]_2 \\
&= \frac{1}{N^2} \sum_{n=1}^N \mathbb{E}_{\mathbf{z}_t^{(n)} \sim K_{\boldsymbol{\lambda}_{t-1}}(\mathbf{z}_{t-1}^{(n)}, \cdot)} \left[ \left\| \mathbf{s}(\boldsymbol{\lambda}; \mathbf{z}_t^{(n)}) \right\|_2^2 \mid \mathbf{z}_{t-1}^{(1:N)}, \boldsymbol{\lambda}_{t-1} \right] \\
&\leq \frac{1}{N^2} \sum_{n=1}^N \left[ \mathbb{E}_{\mathbf{z} \sim q_{\text{def}}(\cdot; \boldsymbol{\lambda}_{t-1})} \left[ \left\| \mathbf{s}(\boldsymbol{\lambda}; \mathbf{z}) \right\|_2^2 \right] + r \left\| \mathbf{s}(\boldsymbol{\lambda}; \mathbf{z}_{t-1}^{(n)}) \right\|_2^2 \right] && \text{Lemma 6} \\
&\leq \frac{1}{N^2} \sum_{n=1}^N [L^2 + rL^2] && \text{Assumption 3} \\
&= \frac{L^2}{N^2} \sum_{n=1}^N [1 + r] \\
&= L^2 \left[ \frac{1}{N} + \frac{1}{N} \left(1 - \frac{1}{w^*}\right) \right].
\end{aligned}$$

□

## E Additional Experimental Results

### E.1 Bayesian Neural Network Regression

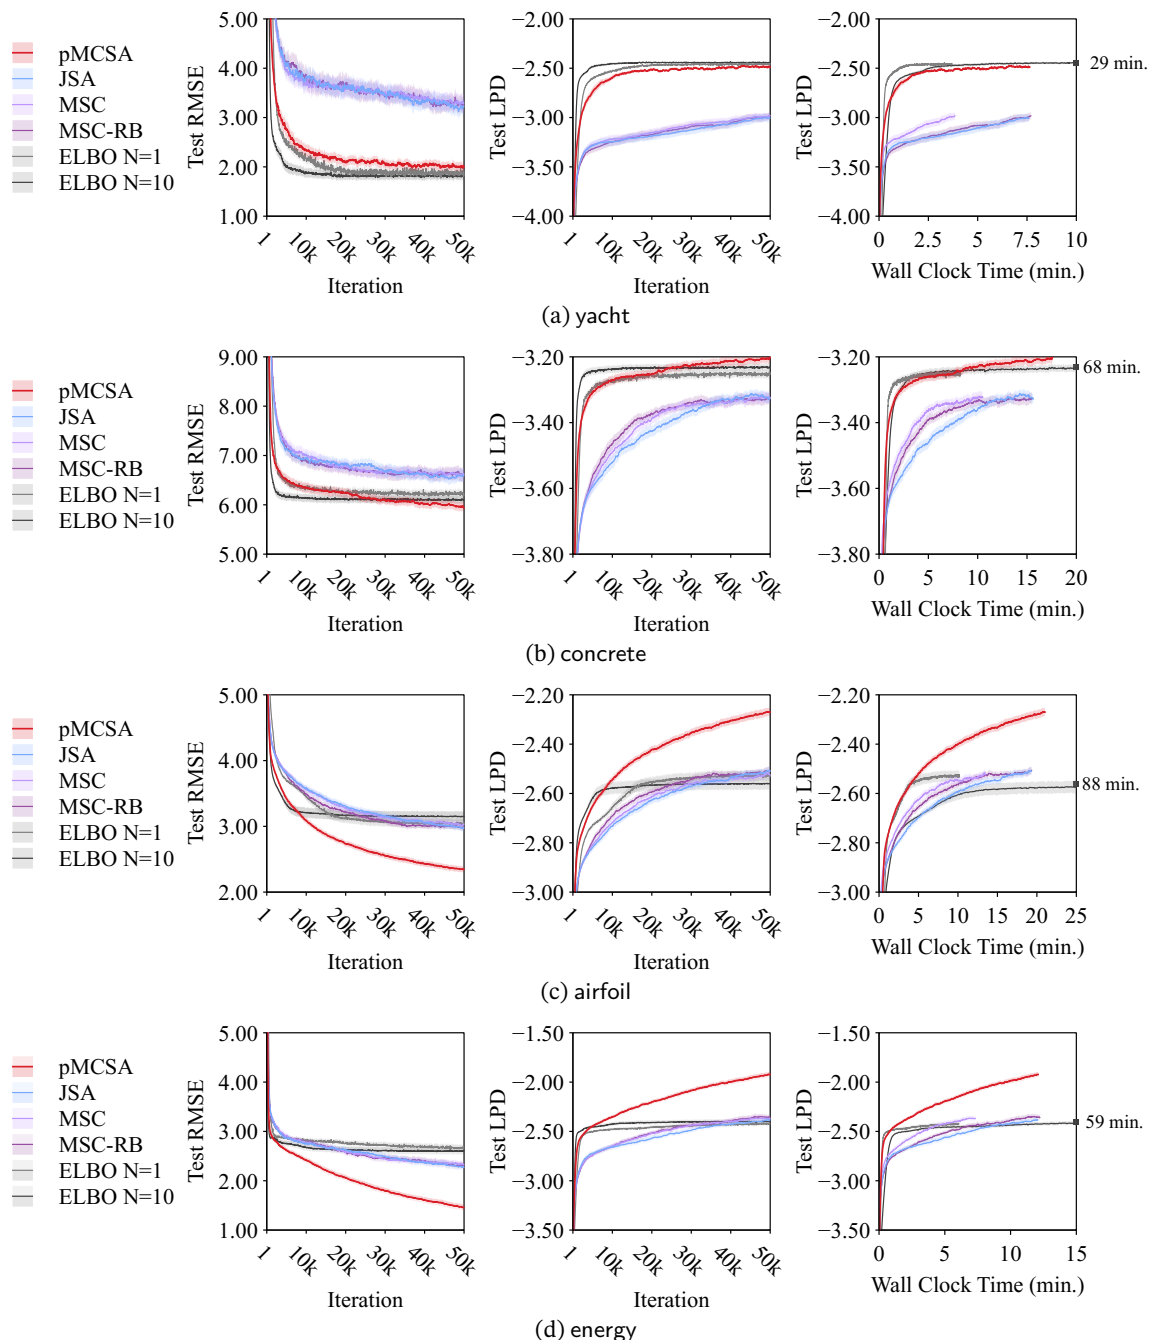

Figure 4: **Test root-mean-square error (RMSE) and test log predictive density (LPD) on Bayesian neural network regression.** The grey squares (■) mark the performance of ELBO  $N = 10$  at the wall clock time shown next to it. The error bands show the 95% bootstrap confidence intervals obtained from 20 independent 90% train-test splits.

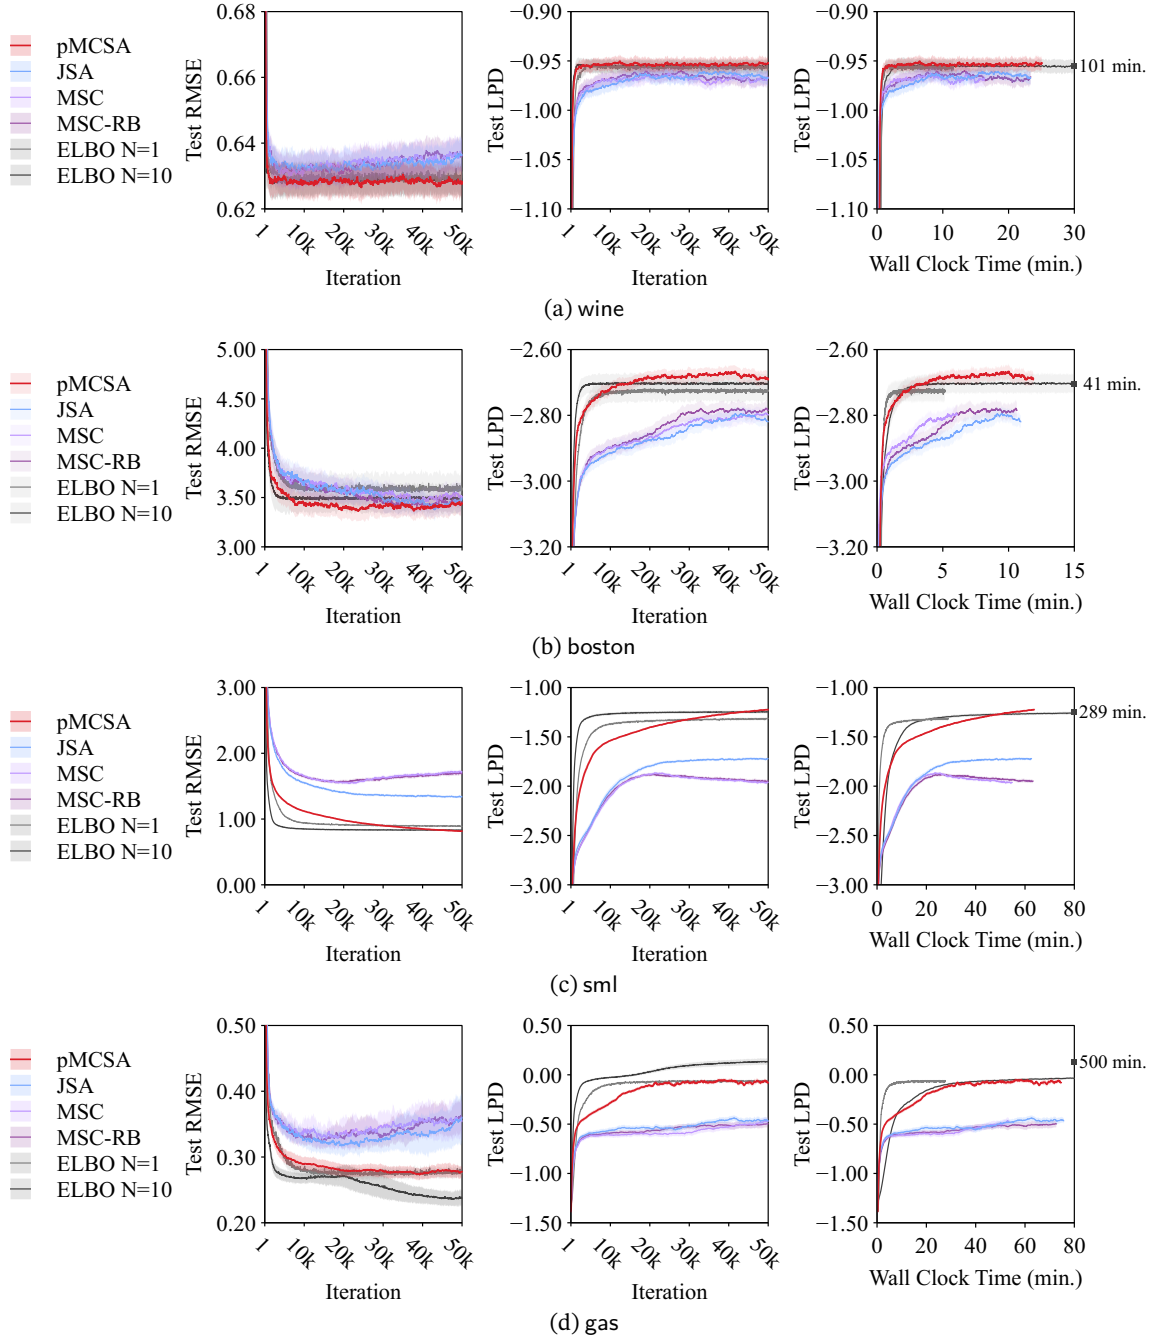

Figure 5: (continued) Test root-mean-square error (RMSE) and test log predictive density (LPD) on Bayesian neural network regression. The grey squares (■) mark the performance of ELBO  $N = 10$  at the wall clock time shown next to it. The error bands show the 95% bootstrap confidence intervals obtained from 20 independent 90% train-test splits.

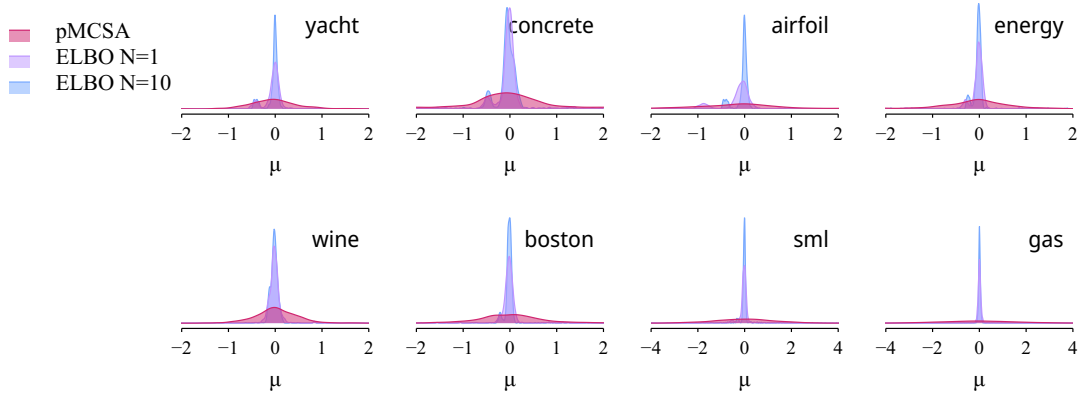

Figure 6: **Distribution of the variational posterior mean of the BNN weights.** The density was estimated with a Gaussian kernel and the bandwidth was selected with Silverman’s rule

## E.2 Robust Gaussian Process Regression

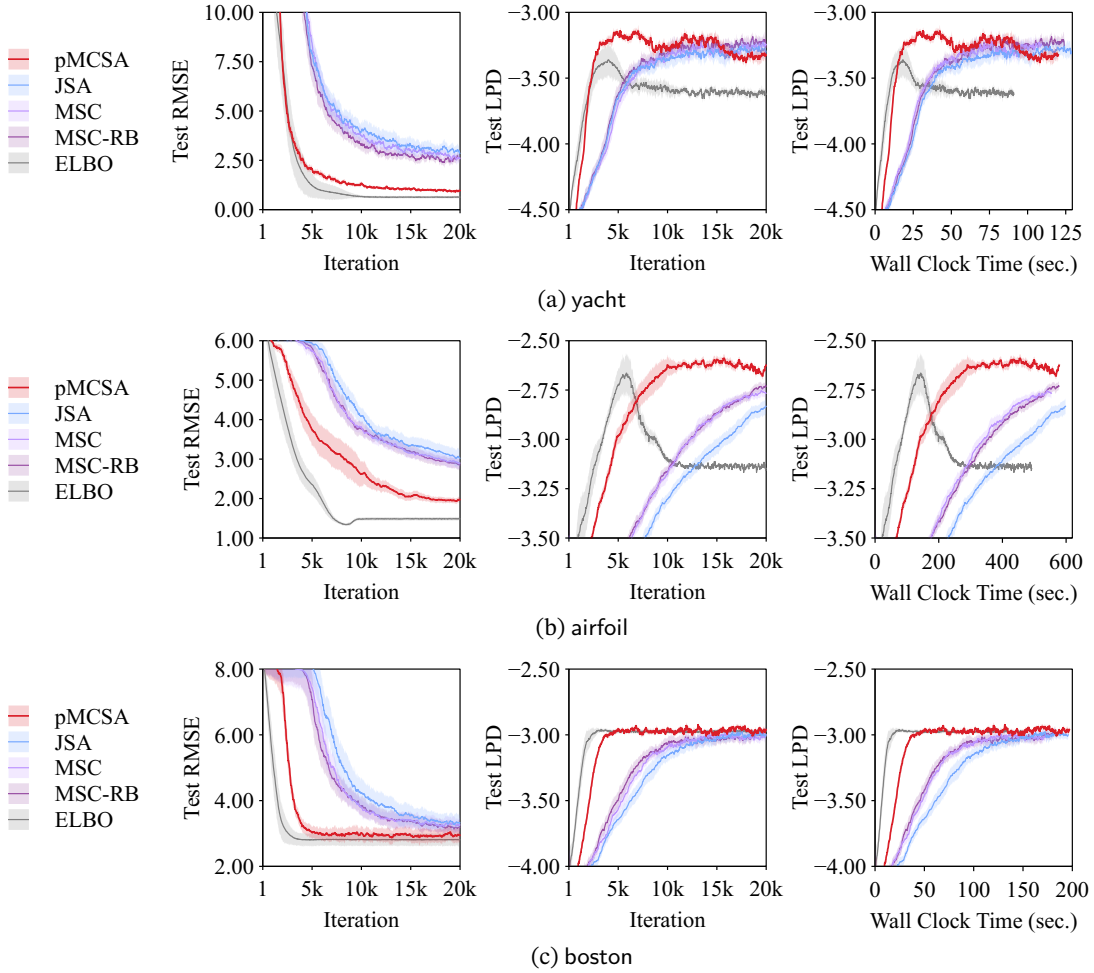

Figure 7: **Test root-mean-square error (RMSE) and test log predictive density (LPD) on robust Gaussian process regression.** The error bands shows the 95% bootstrap confidence interval obtained from 20 repetitions.



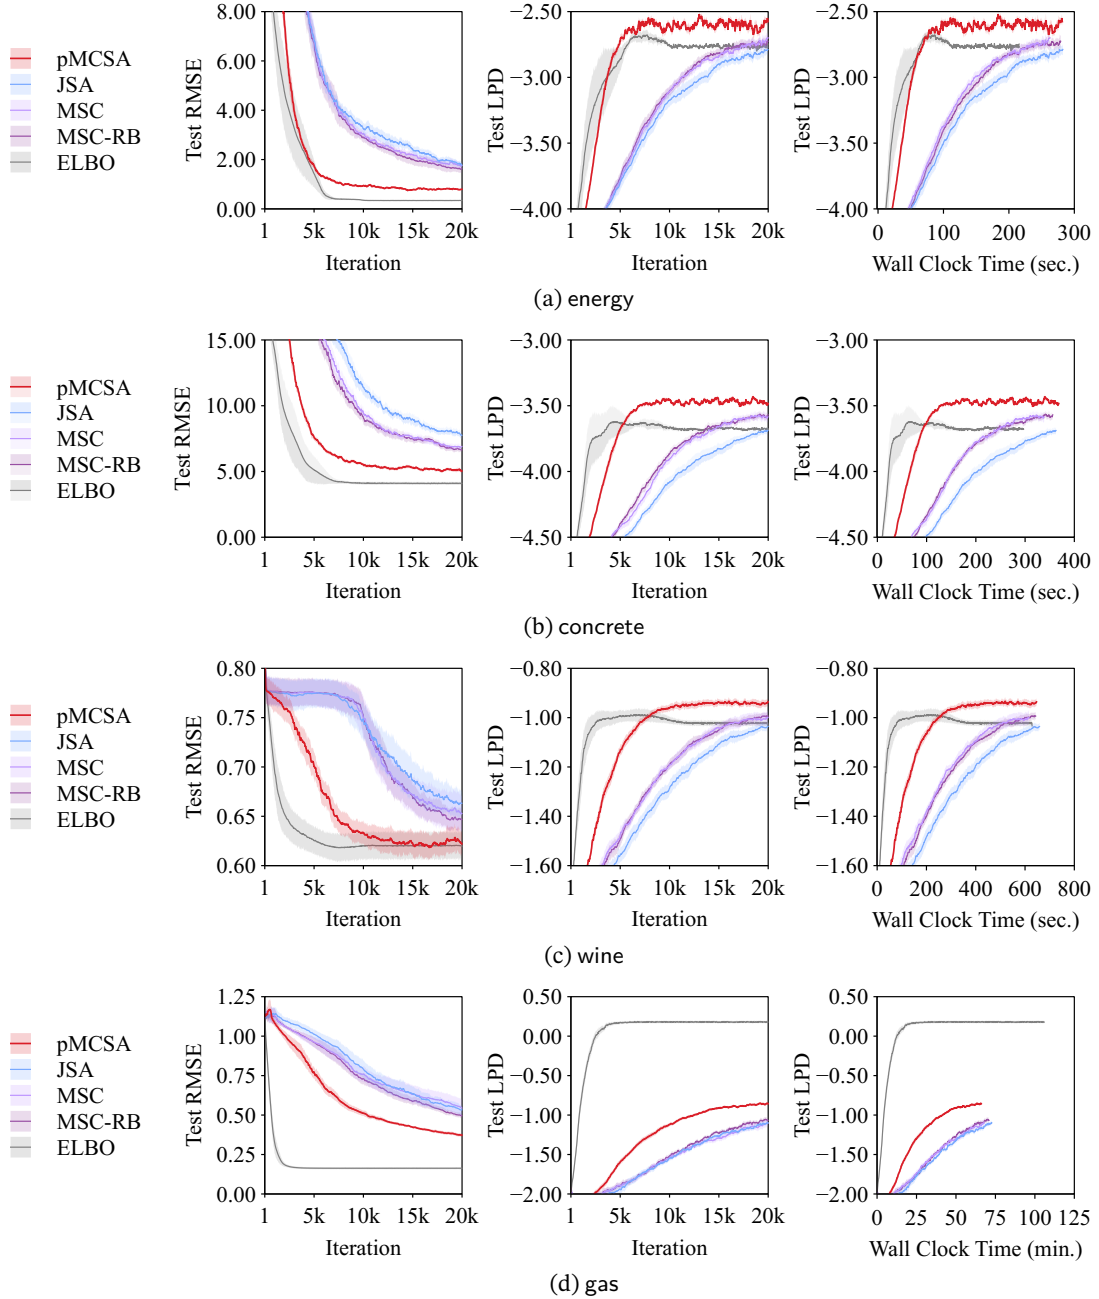

Figure 8: (continued) Test root-mean-square error (RMSE) and test log predictive density (LPD) on robust Gaussian process regression. The error bands show the 95% bootstrap confidence intervals obtained from 20 independent 90% train-test splits.
